# Supplementary material
Source: publisher figshare collection journal article supplement (https://plos.figshare.com/articles/dataset/_/3893376)
Supplement: Supplementary file 1 [file 1]

Archive with 2 entries (2 files):
- S1 File.PDF
- S2 File.PDF
